# Supplementary material for: Transcriptional Upregulation of NLRC5 by Radiation Drives STING- and Interferon-Independent MHC-I Expression on Cancer Cells and T Cell Cytotoxicity
Source: PubMed Central journal article supplement (PMC7193601; doi:10.1038/s41598-020-64408-3), 2020-04-30
Supplement: 41598_2020_64408_MOESM1_ESM.pdf [file 41598_2020_64408_MOESM1_ESM.pdf]

**Supplementary data.**

**Supplementary Figure 1**

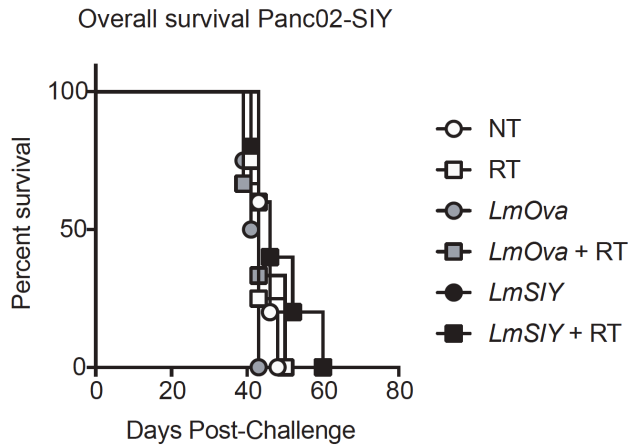

C57BL/6 mice bearing Panc02-SIY were vaccinated with *LmOva* or *LmSIY* on day 17 following tumor challenge and irradiated on d20. Mice were followed for overall survival.

Supplementary Figure 2

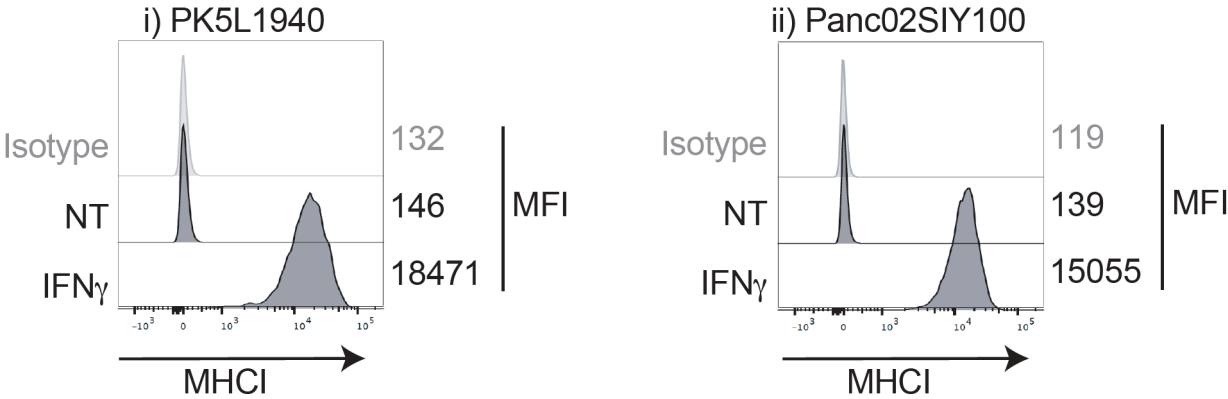

Flow cytometry of untreated or IFN $\gamma$ -treated i) PK5L1940 or ii) Panc02SIY100 with isotype control antibodies or antibodies to MHC I. Numbers indicate MFI of stained cells.

### Supplementary Figure 3

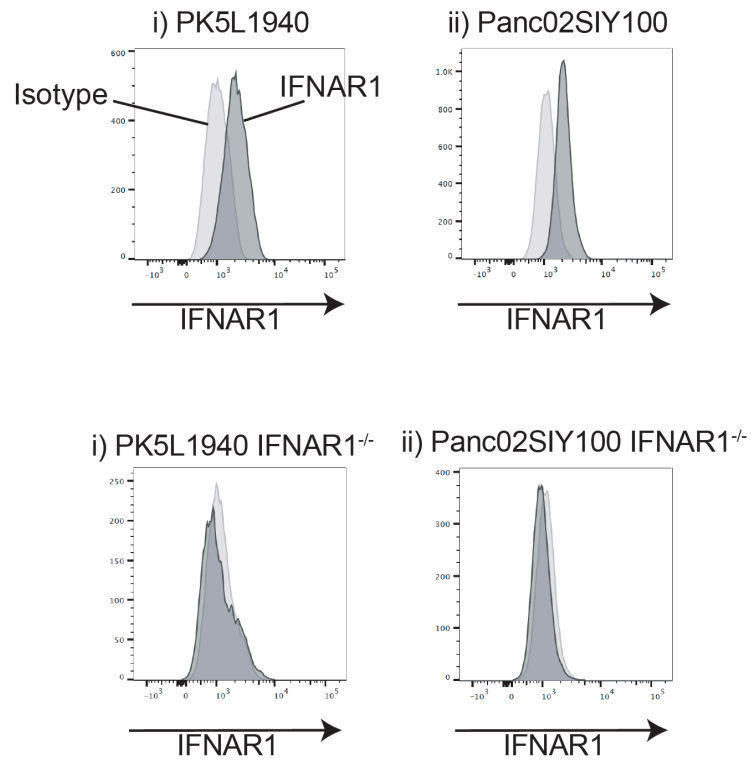

Flow cytometry of i) PK5L1940 or ii) Panc02SIY100 with isotype control antibodies or antibodies to IFNAR1. Top panels show wild-type cells, bottom panels show *IFNAR1*<sup>ko</sup> cells.

### Supplementary Figure 4

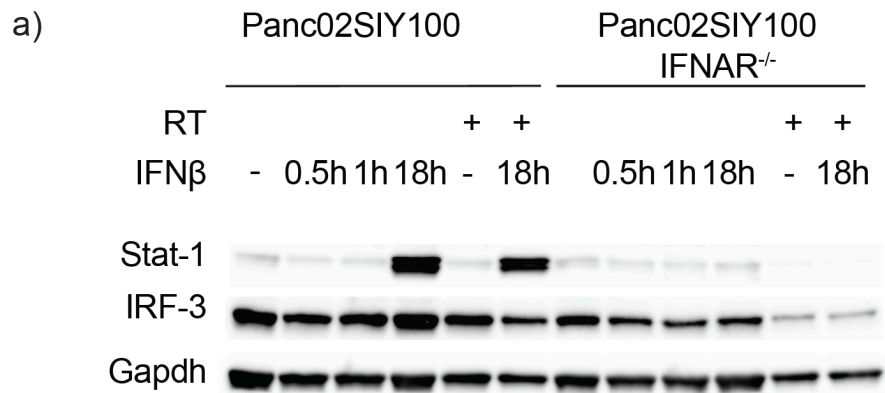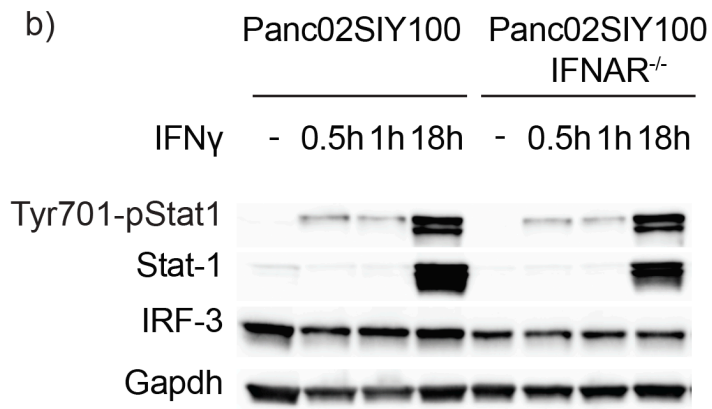

Western blot of Panc02SIY100 and Panc02SIY100IFNAR1<sup>ko</sup> following treatment with a) type I IFN and/or RT or b) IFN $\gamma$  over a time course.

## Supplementary Figure 5

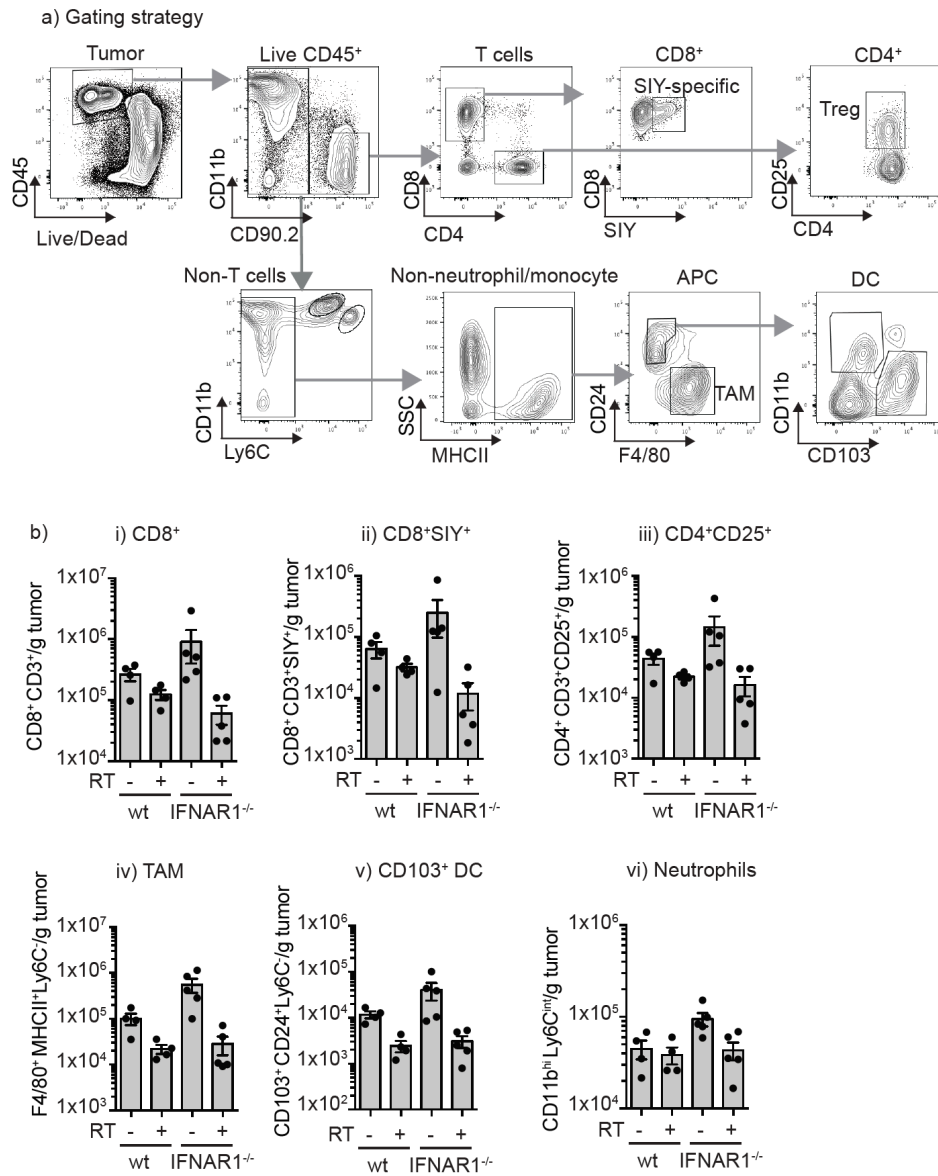

Flow cytometry of Panc02SIY100 and Panc02SIY100IFNAR1<sup>ko</sup> tumors left untreated or treated with 12Gy RT. a) gating strategy b) Major populations of infiltrating cells represented as cells/mg tumor.

Supplementary Figure 6

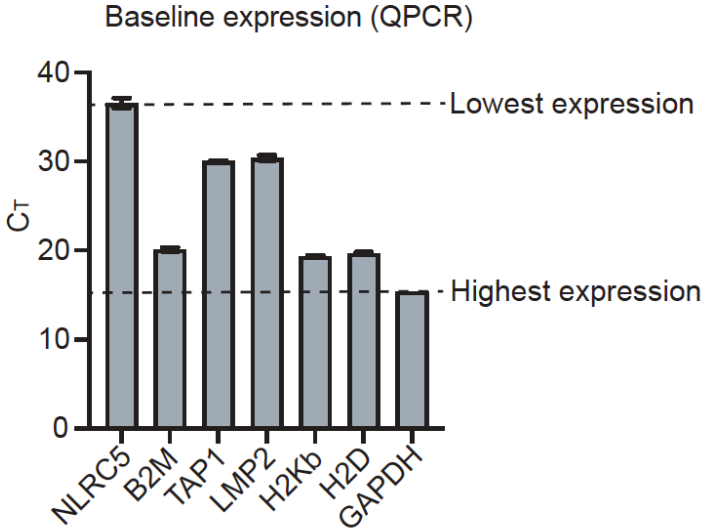

qPCR analysis of antigen processing and presentation components in Panc02SIY100 cancer cells at baseline. Data is represented where fewer cycles indicates a higher abundance of transcript.

### Supplementary Figure 7

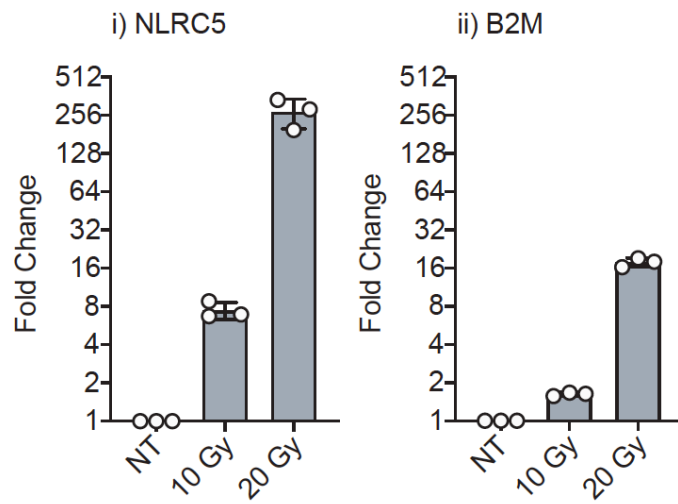

qPCR analysis of NLRC5 and B2M in Panc02SIY100IFNAR1<sup>ko</sup> cancer following treatment with 10 or 20Gy RT. Data is represented as fold change versus untreated cells.

Supplemental Table 1.

| Correlated Gene | Cytoband       | Spearman's Correlation | p-Value         | q-Value         |
|-----------------|----------------|------------------------|-----------------|-----------------|
| <b>HLA-F</b>    | <b>6p22.1</b>  | <b>0.8571073</b>       | <b>2.71E-52</b> | <b>5.41E-48</b> |
| <b>TAP1</b>     | <b>6p21.32</b> | <b>0.82512422</b>      | <b>2.91E-45</b> | <b>2.91E-41</b> |
| <b>HLA-C</b>    | <b>6p21.33</b> | <b>0.81705866</b>      | <b>1.03E-43</b> | <b>6.87E-40</b> |
| <b>HLA-A</b>    | <b>6p22.1</b>  | <b>0.79311733</b>      | <b>1.57E-39</b> | <b>7.84E-36</b> |
| HCP5            | 6p21.33        | 0.75951334             | 1.64E-34        | 6.55E-31        |
| PSMB9           | 6p21.32        | 0.75241945             | 1.48E-33        | 4.93E-30        |
| PSMB8           | 6p21.32        | 0.74837477             | 5.02E-33        | 1.43E-29        |
| <b>HLA-E</b>    | <b>6p22.1</b>  | <b>0.7292572</b>       | <b>1.19E-30</b> | <b>2.98E-27</b> |
| <b>HLA-H</b>    | <b>6p22.1</b>  | <b>0.68336767</b>      | <b>1.08E-25</b> | <b>2.39E-22</b> |
| <b>B2M</b>      | <b>15q21.1</b> | <b>0.67768044</b>      | <b>3.83E-25</b> | <b>7.65E-22</b> |
| HCG26           | 6p21.33        | 0.65615207             | 3.66E-23        | 6.64E-20        |
| CD74            | 5q33.1         | 0.62363446             | 1.84E-20        | 3.06E-17        |
| IFI35           | 17q21.31       | 0.60507739             | 4.67E-19        | 7.18E-16        |
| NFKBIE          | 6p21.1         | 0.60012379             | 1.07E-18        | 1.53E-15        |
| <b>IRF1</b>     | <b>5q31.1</b>  | <b>0.59426776</b>      | <b>2.80E-18</b> | <b>3.73E-15</b> |
| <b>NLRC5</b>    | <b>16q13</b>   | <b>0.59135489</b>      | <b>4.48E-18</b> | <b>5.59E-15</b> |
| <b>TAP2</b>     | <b>6p21.32</b> | <b>0.58598795</b>      | <b>1.05E-17</b> | <b>1.24E-14</b> |
| TAPBP           | 6p21.32        | 0.58503142             | 1.22E-17        | 1.36E-14        |
| UBE2L6          | 11q12.1        | 0.58457696             | 1.31E-17        | 1.38E-14        |
| TYMP            | 22q13.33       | 0.58276346             | 1.75E-17        | 1.74E-14        |
| ZBP1            | 20q13.31       | 0.57975754             | 2.78E-17        | 2.65E-14        |
| IL411           | 19q13.33       | 0.57133057             | 1.00E-16        | 8.98E-14        |
| SLC15A3         | 11q12.2        | 0.57094103             | 1.07E-16        | 8.98E-14        |
| LGALS9          | 17q11.2        | 0.57085663             | 1.08E-16        | 8.98E-14        |

Top 25 genes with RNA expression most correlated with HLA-B mRNA expression according to cBioportal analysis of TCGA Pancreatic Adenocarcinoma PancCancer Atlas.
